# Supplementary material
Source: publisher site journal article supplement (https://www.dovepress.com/article/478352)

# SUPPLEMENTARY APPENDIX

**Supplementary Table 1.** Thresholds for defining greater versus lesser disease burden.

| **Disease Burden Measure** | **Greater Burden** | **Lesser Burden** |
| --- | --- | --- |
| DLQI11 | >5 | ≤5 |
| VAS itch14 | ≥30 | <30 |
| VAS skin pain12 | ≥45 | <45 |
| VAS fatigue16 | ≥50 | <50 |
| EQ-5D-3La | Moderate or extreme problems | No problems |
| WPAI, activities impairment | >0 | 0 |
| PGA-VAS13,15,17 | ≥20 | <20 |

aThe 5 subscale dimensions were mobility, self-care, usual activities, pain/discomfort, and anxiety/depression.

**Abbreviations:** DLQI, Dermatology Life Quality Index; EQ-5D-3L, 3-level EQ-5D; PGA-VAS, Patient Global Assessment visual analog scale; VAS, visual analog scale; WPAI, Work Productivity and Activity Impairment questionnaire.

**Supplementary Table 2.** Percentages of patients who switched to biologic treatment in each patient-reported disease burden and HRQoL indicator group.

| **Disease Burden Measure** | **Total,a n (%)b** | **Switchers, n (%)c** |
| --- | --- | --- |
| DLQI |  |  |
| ≤5 | 428 (50.5) | 111 (25.9) |
| >5 | 419 (49.5) | 211 (50.4) |
| VAS itch |  |  |
| <30 | 390 (46.1) | 85 (21.8) |
| ≥30 | 456 (53.9) | 236 (51.8) |
| VAS skin pain |  |  |
| <45 | 657 (77.8) | 207 (31.5) |
| ≥45 | 187 (22.2) | 113 (60.4) |
| VAS fatigue |  |  |
| <50 | 553 (65.4) | 168 (30.4) |
| ≥50 | 293 (34.6) | 153 (52.2) |
| EQ-5D-3L mobility problems |  |  |
| None | 640 (75.7) | 236 (36.9) |
| Moderate/extreme | 205 (24.3) | 86 (42.0) |
| EQ-5D-3L self-care problems |  |  |
| None | 789 (93.5) | 296 (37.5) |
| Moderate/extreme | 55 (6.5) | 25 (45.5) |
| EQ-5D-3L usual activities problems |  |  |
| None | 609 (72.1) | 213 (35.0) |
| Moderate/extreme | 236 (27.9) | 109 (46.2) |
| EQ-5D-3L pain and discomfort |  |  |
| None | 403 (47.7) | 126 (31.3) |
| Moderate/extreme | 442 (52.3) | 195 (44.1) |
| EQ-5D-3L anxiety/depression |  |  |
| None | 561 (66.4) | 191 (34.0) |
| Moderate/extreme | 284 (33.6) | 131 (46.1) |
| WPAI activities impairment |  |  |
| None | 332 (39.7) | 75 (22.6) |
| Moderate/extreme | 505 (60.3) | 246 (48.7) |
| PGA-VAS |  |  |
| <20 | 248 (29.3) | 34 (13.7) |
| ≥20 | 597 (70.7) | 288 (48.2) |

aSample sizes may not sum to 848 owing to missing data.

bPercentage of patients in each disease burden category.

cPercentage of patients in each disease burden category who switched to a biologic treatment.

**Abbreviations:** DLQI, Dermatology Life Quality Index; EQ-5D-3L, 3-level EQ-5D; HRQoL, health-related quality of life; PGA-VAS, Patient Global Assessment visual analog scale; VAS, visual analog scale; WPAI, Work Productivity and Activity Impairment questionnaire.

**Supplementary Table 3.** Unadjusted odds ratios of switching to biologic therapy, estimated with models specific to each measure or subscale.

| **Disease Burden Measure** | **OR** | **95% CI** | ***P*** |
| --- | --- | --- | --- |
| DLQI >5 | 2.90 | 2.17, 3.87 | <0.001 |
| VAS itch ≥30 | 3.85 | 2.84, 5.21 | <0.001 |
| VAS skin pain ≥45 | 3.32 | 2.37, 4.65 | <0.001 |
| VAS fatigue ≥50 | 2.50 | 1.87, 3.35 | <0.001 |
| Mobility problemsa | 1.24 | 0.90, 1.70 | 0.193 |
| Self-care problemsa | 1.39 | 0.80, 2.41 | 0.243 |
| Usual activitiesa | 1.60 | 1.18, 2.17 | 0.003 |
| Pain and discomforta | 1.74 | 1.31, 2.30 | <0.001 |
| Anxiety/depressiona | 1.66 | 1.24, 2.22 | <0.001 |
| WPAI, activities impairment | 3.25 | 2.39, 4.44 | <0.001 |
| PGA-VAS ≥20 | 5.87 | 3.95, 8.72 | <0.001 |

aMeasured by the EQ-5D-3L.

**Abbreviations:** CI, confidence interval;DLQI, Dermatology Life Quality Index; EQ-5D-3L, 3-level EQ-5D; OR, odds ratio; PGA-VAS, Patient Global Assessment visual analog scale; VAS, visual analog scale; WPAI, Work Productivity and Activity Impairment questionnaire.

**Supplementary Table 4.** Reasons for switching to biologic treatment in patients with plaque psoriasis from the CorEvitas Psoriasis Registry.

| **Reason for Switching** | **Patients, n (%)**  **N=323** | **Days From Initiation,**  **Median (IQR)a** |
| --- | --- | --- |
| Safety |  |  |
| Major side effect | 1 (0.3) | – |
| Effectiveness |  |  |
| Active disease | 294 (91.0) | 103 (48, 169) |
| Alternative MOA | 5 (1.5) | 129 (79, 208) |
| Improve tolerability | 4 (1.2) | – |
| Improve adherence | 4 (1.2) | – |
| Other |  |  |
| Patient request | 11 (3.4) | 56 (38, 103) |
| Other reasons | 3 (0.9) | – |
| Drug administration | 1 (0.3) | – |

aMedian and IQR restricted in cells with ≤5 patients.

**Abbreviations:** IQR, interquartile range; MOA, mechanism of action.

**Supplementary Table 5.** Unadjusted odds ratios of switching to biologic therapy, estimated with models specific to each measure or subscale.

|  | **PASI ≤2 (n=330)** | | | | **PASI ≤4 (n=507)** | | |
| --- | --- | --- | --- | --- | --- | --- | --- |
| **Disease Burden Measure** | **OR** | **95% CI** | ***P*** | **OR** | | **95% CI** | ***P*** |
| DLQI >5 | 1.91 | 1.05, 3.49 | 0.034 | 2.53 | | 1.67, 3.83 | <0.001 |
| VAS itch ≥30 | 4.70 | 2.48, 8.92 | <0.001 | 4.50 | | 2.87, 7.03 | <0.001 |
| VAS skin pain ≥45 | 3.91 | 1.90, 8.07 | <0.001 | 3.88 | | 2.36, 6.39 | <0.001 |
| VAS fatigue ≥50 | 2.50 | 1.36, 4.59 | 0.003 | 2.58 | | 1.69, 3.94 | <0.001 |
| Mobility problemsa | 1.36 | 0.69, 2.67 | 0.379 | 1.30 | | 0.81, 2.07 | 0.271 |
| Self-care problemsa | 1.69 | 0.53, 5.41 | 0.375 | 1.34 | | 0.54, 3.31 | 0.529 |
| Usual activitiesa | 2.21 | 1.19, 4.11 | 0.012 | 2.11 | | 1.36, 3.25 | <0.001 |
| Pain and discomforta | 1.65 | 0.90, 2.99 | 0.103 | 2.13 | | 1.40, 3.25 | <0.001 |
| Anxiety/depressiona | 1.92 | 1.05, 3.52 | 0.035 | 2.25 | | 1.48, 3.42 | <0.001 |
| WPAI, activities impairment | 2.24 | 1.22, 4.14 | 0.010 | 3.06 | | 1.96, 4.77 | <0.001 |
| PGA-VAS ≥20 | 5.66 | 2.57, 12.46 | <0.001 | 6.20 | | 3.53, 10.88 | <0.001 |

aMeasured by the EQ-5D-3L.

**Abbreviations:** CI, confidence interval;DLQI, Dermatology Life Quality Index; EQ-5D-3L, 3-level EQ-5D; OR, odds ratio; PASI, Psoriasis Area and Severity Index Score; PGA-VAS, Patient Global Assessment visual analog scale; VAS, visual analog scale; WPAI, Work Productivity and Activity Impairment questionnaire.

**Supplementary Figure 1.** Adjusted associations (aOR and 95% CI) for patient-reported outcome measures and switching to biologic treatment in patients with PASI scores ≤2 (n=330), estimated with models specific to each measure or subscale.a

aVariables adjusted for included age, sex, race, ethnicity, work status, body mass index, psoriasis duration, psoriatic arthritis, number of nonbiologic systemics used before the study period began, history of psoriasis in difficult-to-treat areas, and disease severity as measured by body surface area involvement, Psoriasis Area and Severity Index score, and Investigator’s Global Assessment score.

bMeasured by the EQ-5D-3L.

**Abbreviations:** aOR, adjusted odds ratio; CI, confidence interval; DLQI, Dermatology Life Quality Index; EQ-5D-3L, 3-level EQ-5D; PASI, Psoriasis Area and Severity Index; PGA-VAS, Patient Global Assessment visual analog scale; VAS, visual analog scale; WPAI, Work Productivity and Activity Impairment questionnaire.


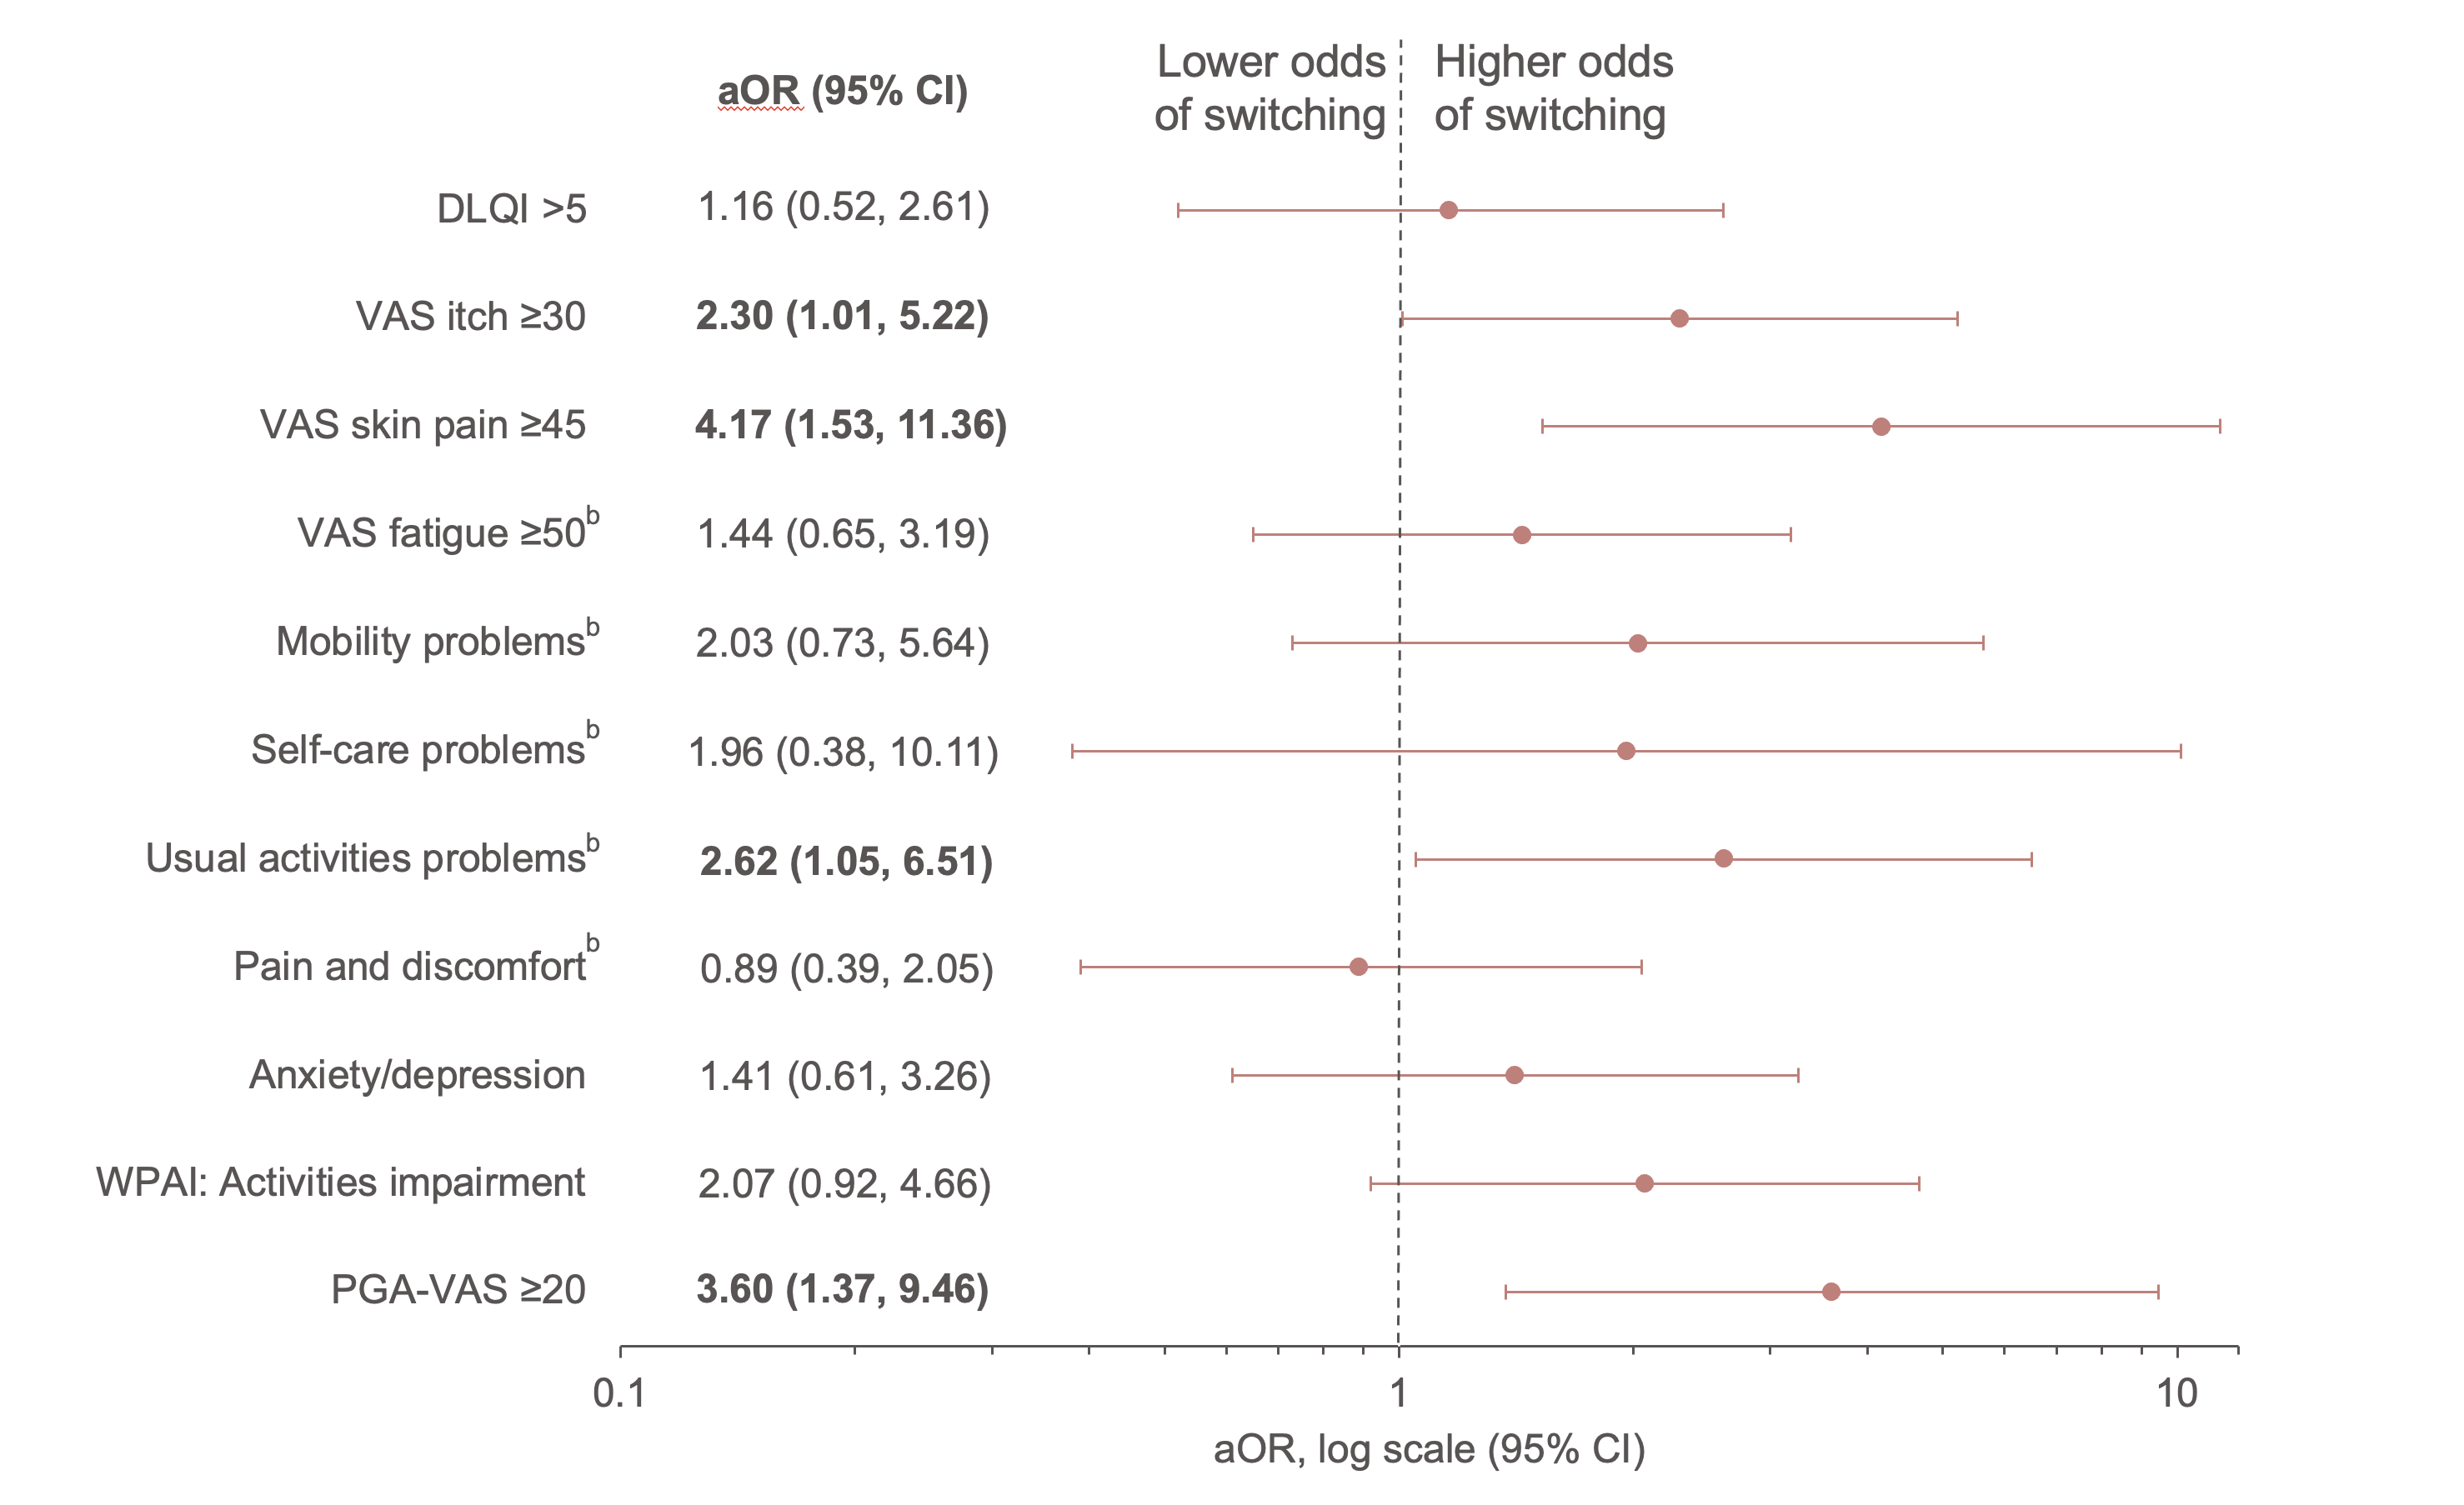


**Supplementary Figure 2.** Adjusted associations (aOR and 95% CI) for patient-reported outcome measures and switching to biologic treatmentin patients with PASI scores ≤4 (n=507), estimated with models specific to each measure or subscale.a

aVariables adjusted for included age, sex, race, ethnicity, work status, body mass index, psoriasis duration, psoriatic arthritis, number of nonbiologic systemics used before the study period began, history of psoriasis in difficult-to-treat areas, and disease severity as measured by body surface area involvement, Psoriasis Area and Severity Index score, and Investigator’s Global Assessment score.

bMeasured by the EQ-5D-3L.

**Abbreviations:** aOR, adjusted odds ratio; CI, confidence interval; DLQI, Dermatology Life Quality Index; EQ-5D-3L, 3-level EQ-5D; PASI, Psoriasis Area and Severity Index; PGA-VAS, Patient Global Assessment visual analog scale; VAS, visual analog scale; WPAI, Work Productivity and Activity Impairment questionnaire.


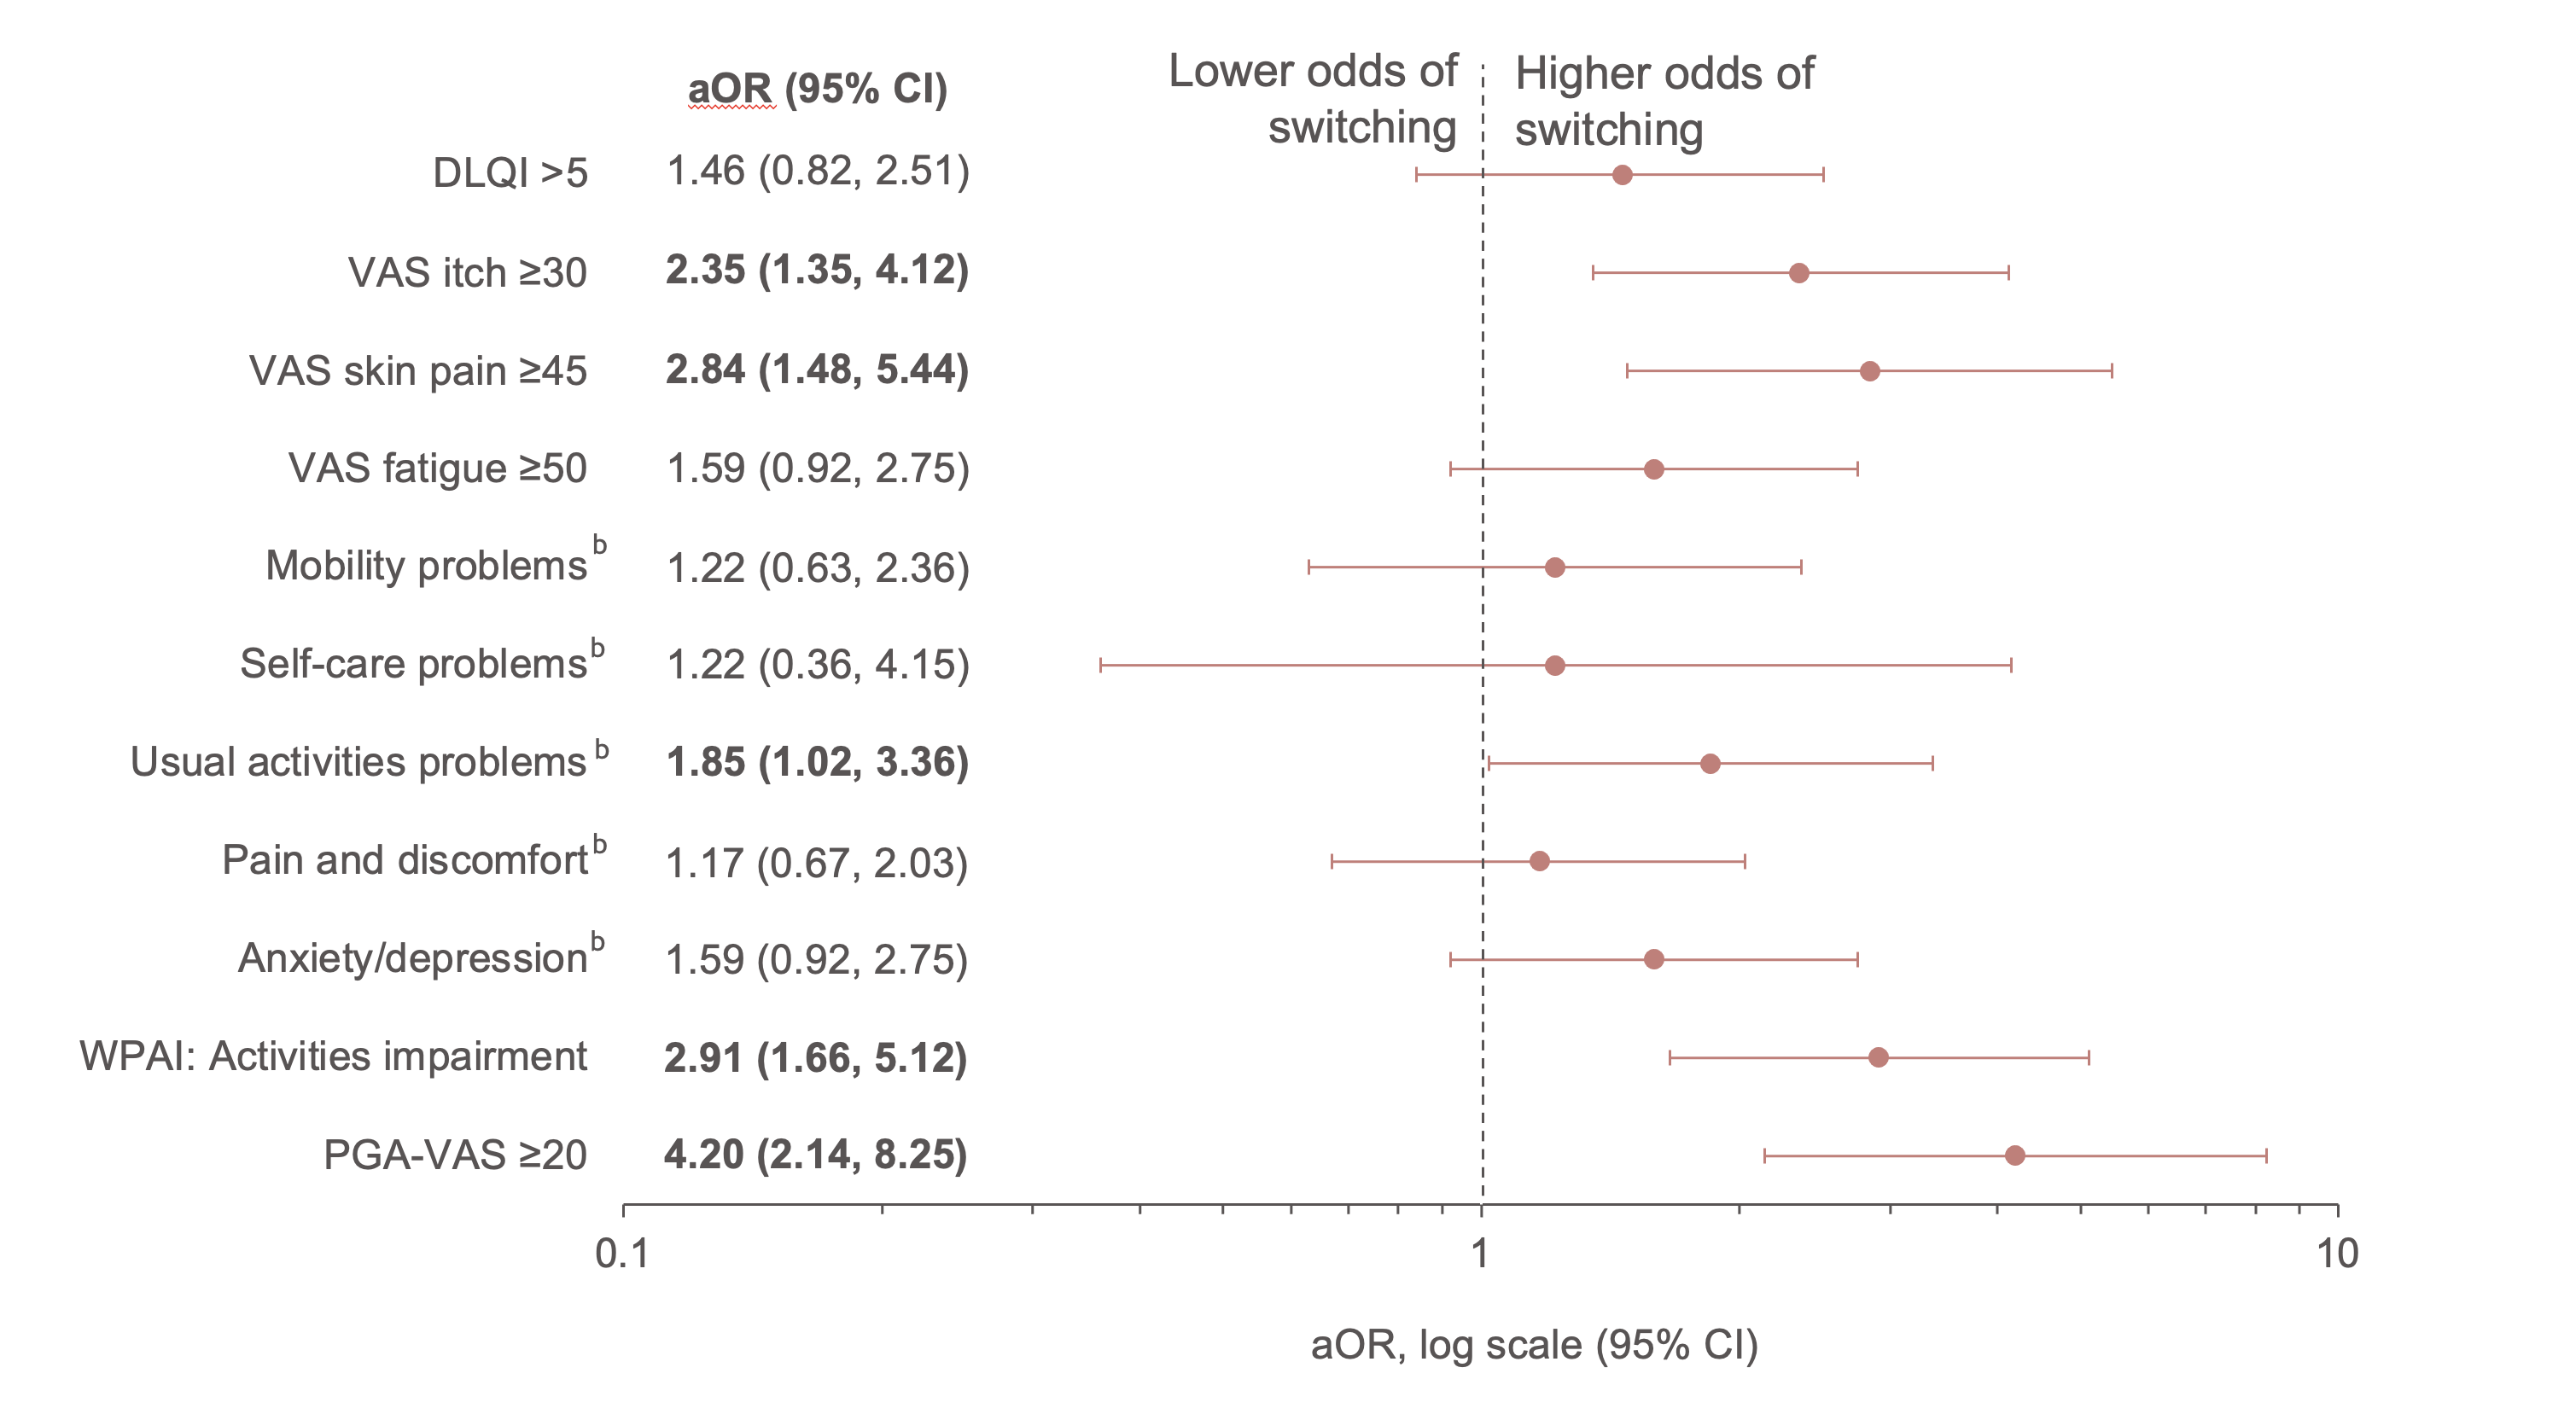

Supplement: Supplementary file 1 [file get_supplementary_file.php]
